# Supplementary material for: TRIM31 promotes Atg5/Atg7-independent autophagy in intestinal cells
Source: PubMed Central journal article supplement (PMC4890305; doi:10.1038/ncomms11726), 2016-05-24
Supplement: ncomms11726-s1.pdf [file ncomms11726-s1.pdf]

Supplementary Figure 1. Ra et al.

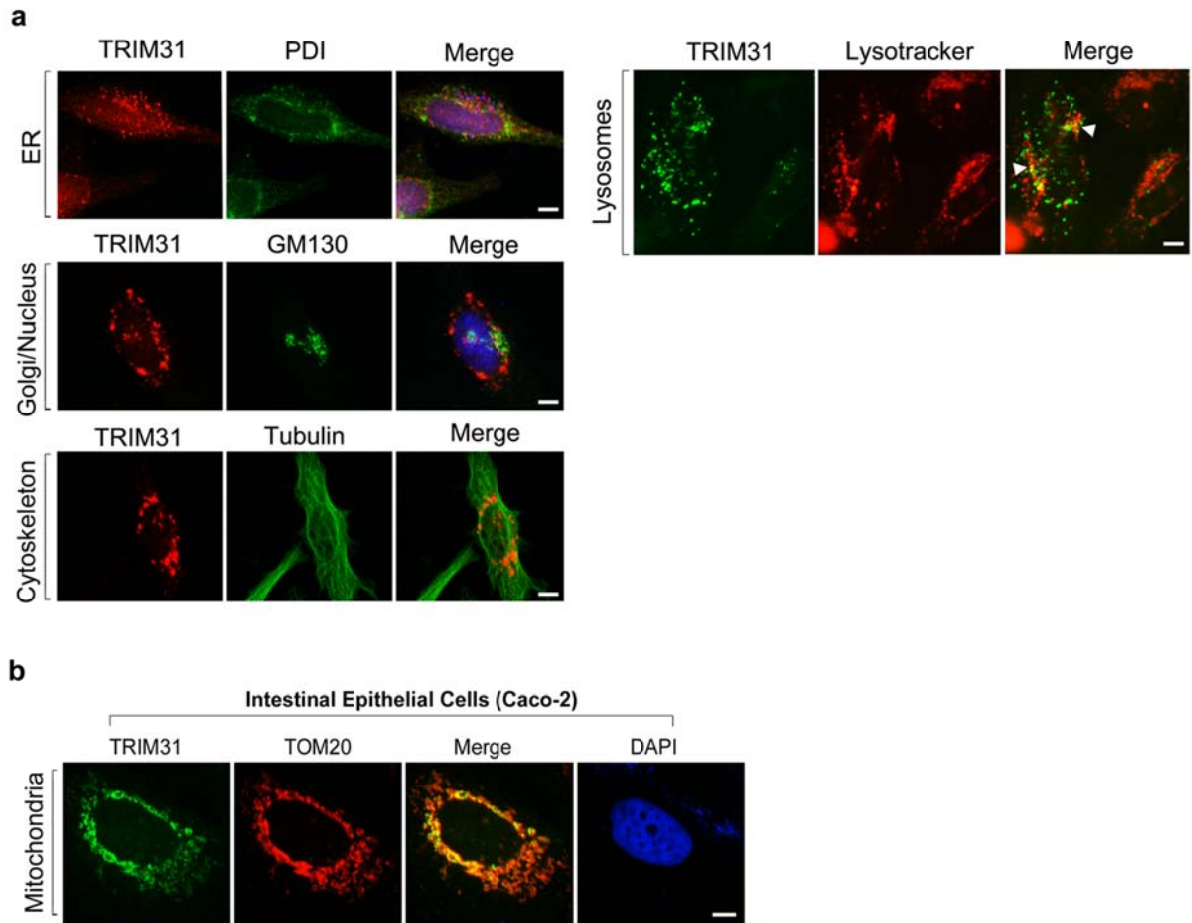

**Supplementary Figure 1. TRIM31 is colocalized with lysosomes and mitochondria.** (a) HeLa cells expressing TRIM31-Myc were immunostained with anti-Myc (TRIM31), anti-PDI (ER), anti-GM130 (Golgi), anti-Tubulin (cytoskeleton), and DAPI (nucleus). HeLa cells also transfected with vectors expressing GFP-TRIM31-Myc were treated with chloroquine (5  $\mu$ M) for obtaining a clear image of lysosomes and stained with lysotracker (lysosomes). Cells were visualized by immunofluorescence assay. Scale bars, 5  $\mu$ m. (b) TRIM31 is enriched in the mitochondria of intestinal cells (Caco-2). Intestinal epithelial cells were immunostained with anti-TRIM31 and anti-TOM20 (mitochondria) antibodies. All data are representative of at least two independent experiments.

**Supplementary Figure 2. Ra et al.**

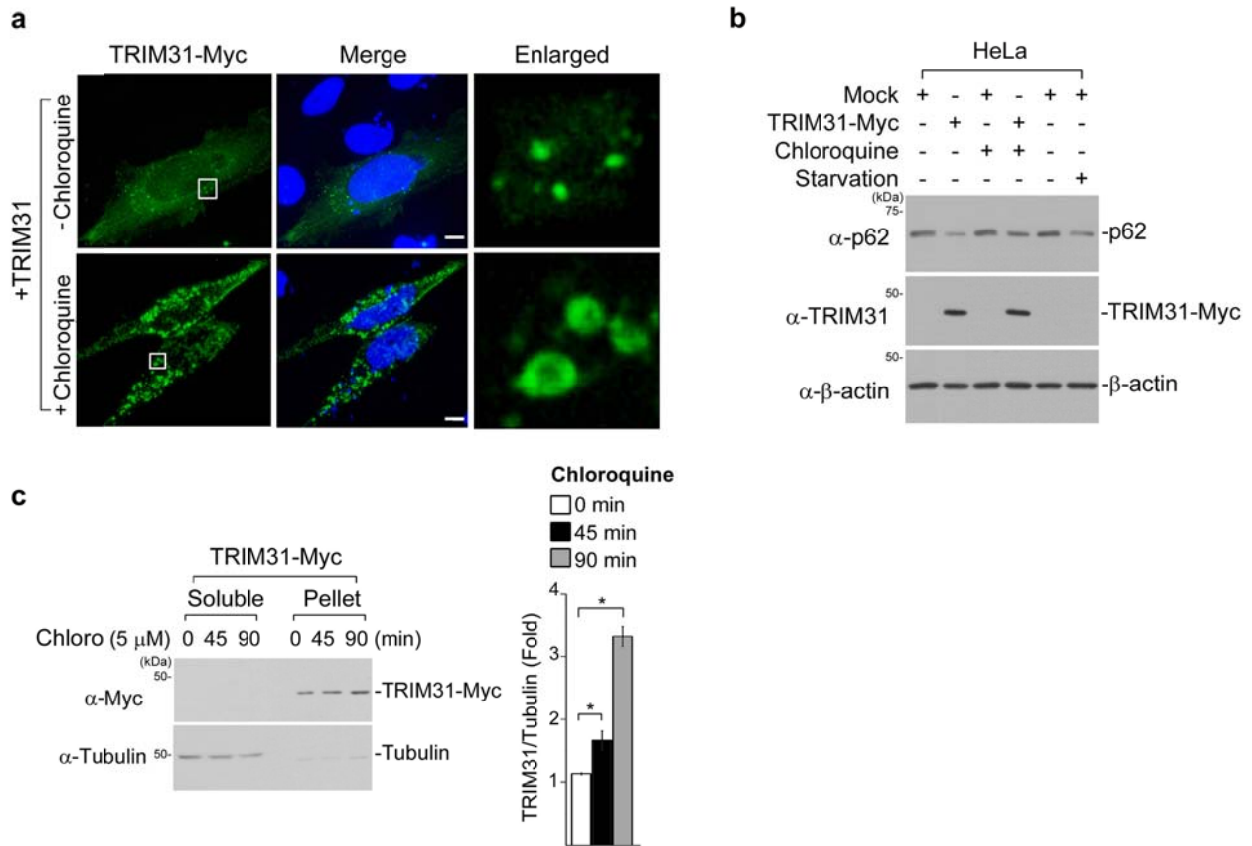

**Supplementary Figure 2. TRIM31 induces autophagy-like vesicle formation.** (a) HeLa cells transfected with vectors expressing TRIM31-Myc were left untreated or treated with chloroquine (5 μM) for 6 h, immunostained with anti-Myc (green) antibody, and visualized by confocal microscopy. Blue, DAPI. Scale bars, 5 μm. (b) HeLa cells were transfected with plasmids expressing empty vector or TRIM31-Myc and then incubated with chloroquine (5 μM) for 4 h or serum-free DMEM for 6 h. Endogenous p62 expression levels were determined by immunoblotting with anti-p62 antibody. (c) HeLa cells transiently expressing TRIM31-Myc were lysed with 0.5% NP-40 and separated into soluble and pellet fractions by centrifugation. Samples were subjected to SDS-PAGE and detected with primary antibodies as indicated. Quantification of TRIM31 protein levels as determined by scanning densitometry were normalized to tubulin in the *right graph*. \* $P < 0.01$  (Student's *t*-test). All data are representative of at least three independent experiments (mean ± s.d. in c).

Supplementary Figure 3. Ra et al.

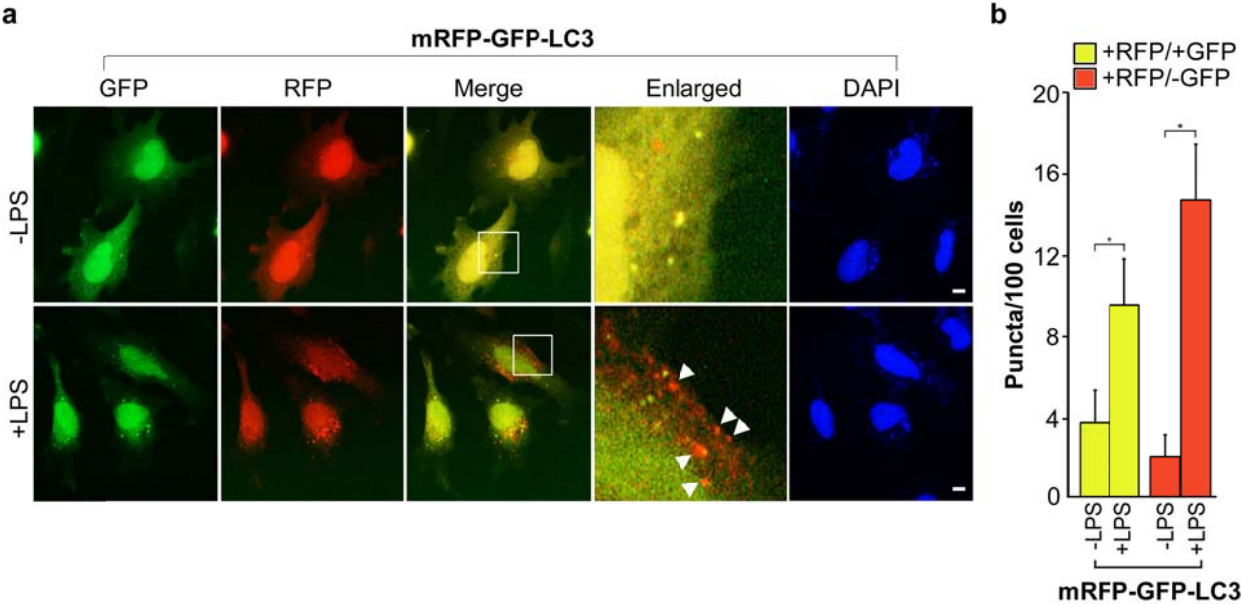

**Supplementary Figure 3. LPS induces autolysosome formation.** (a) HeLa cells expressing mRFP-GFP-LC3 were left untreated or treated with LPS (100 ng per ml) for 4 h. Blue, DAPI. Scale bars, 5  $\mu$ m. Quantification for yellow or red puncta is shown in the graph, (b). \* $P < 0.01$  (Student's  $t$ -test). All data are representative of at least three independent experiments (mean  $\pm$  s.d. in b).

**Supplementary Figure 4. Ra et al.**

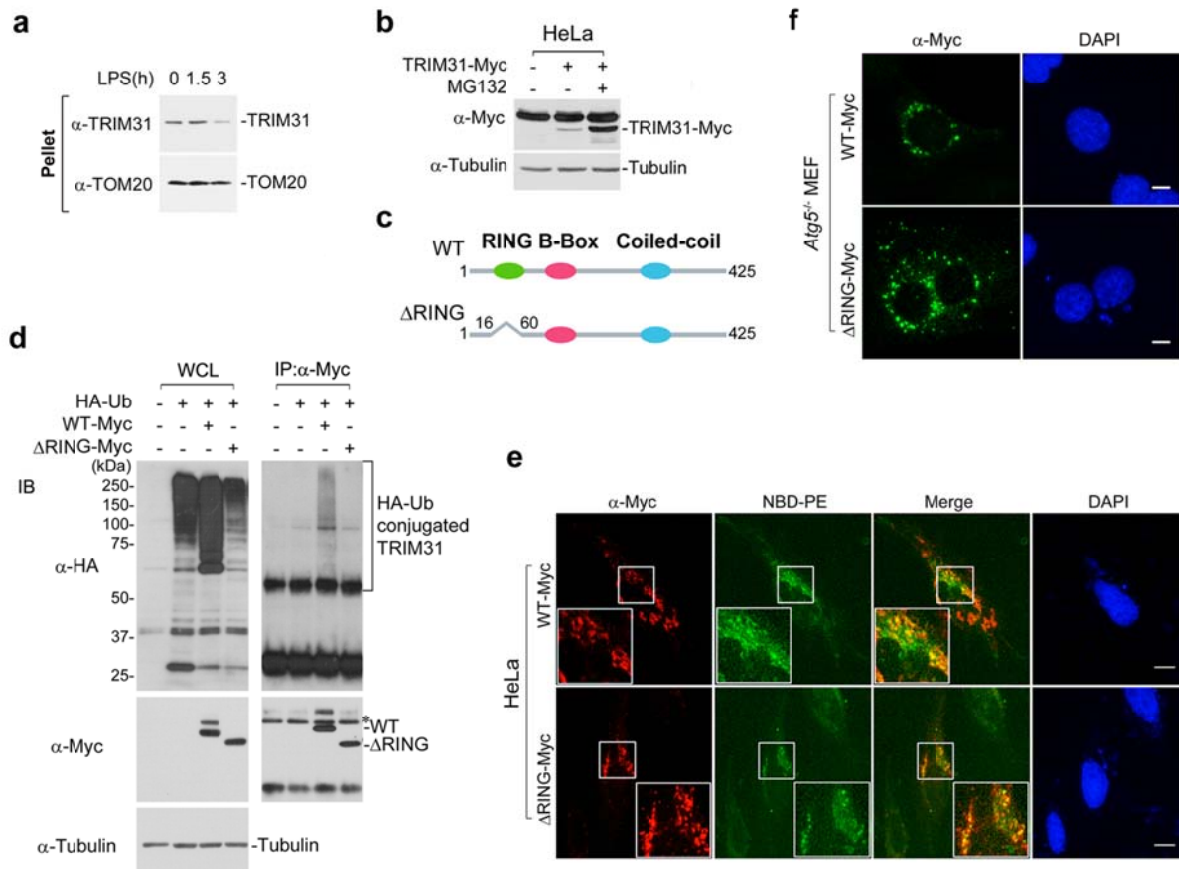

**Supplementary Figure 4. TRIM31 is degraded in a proteasome-dependent manner.** (a) HeLa cells transiently expressing TRIM31-Myc were treated for 1.5 h or 3 h with LPS, lysed with 0.5% NP-40, and separated into soluble and pellet fractions by centrifugation. Samples were subjected to SDS-PAGE and detected with primary antibodies as indicated. (b) HeLa cells transiently expressing TRIM31-Myc were left untreated or treated with MG132 (20 μM) for 4 h. (c) Schematic diagram of human TRIM31 and RING deletion mutants. The RING, B-box, and coiled-coil domains are depicted in green, pink, and blue, respectively. (d) Immunoblot analysis of the ubiquitination of wild-type TRIM31 (WT-Myc) or RING deletion mutant of TRIM31 (ΔRING-Myc) in HEK293T cells. Cells were transfected with WT-Myc, ΔRING-Myc, and HA-tagged ubiquitin (HA-Ub) as indicated. Ubiquitination levels of TRIM31 were determined by anti-HA antibody after immunoprecipitation with anti-Myc antibody. (e) RING deletion mutant of TRIM31 colocalizes with NBD-PE puncta. HeLa cells transiently expressing wild type TRIM31 (WT-Myc) or RING deletion mutant (ΔRING-Myc) were labeled with liposomes containing 20% NBD-PE and 80% POPC, followed by immunostaining with anti-Myc antibody. Scale bars, 5 μm. (f) *Atg5<sup>-/-</sup>* MEFs stably expressing wild type TRIM31 (WT-Myc) or RING deletion mutant (ΔRING-Myc) were stained using anti-Myc antibody and analyzed by immunofluorescence assay. Scale bars, 5 μm. All data are representative of at least two independent experiments.

**Supplementary Figure 5. Ra et al.**

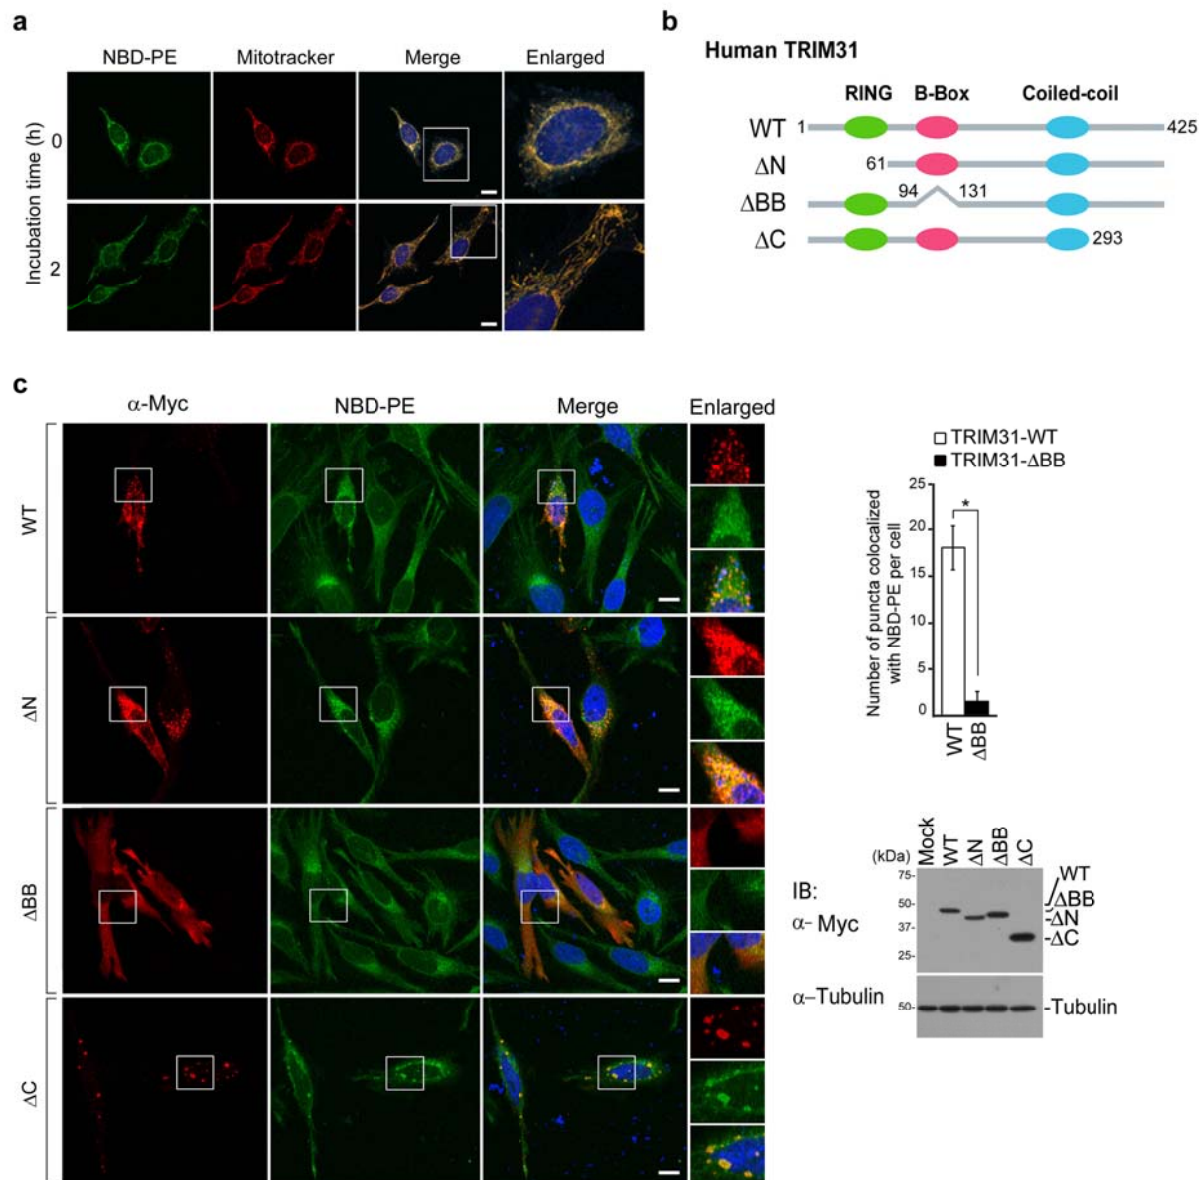

**Supplementary Figure 5. The B-box domain of TRIM31 is required for PE interaction.** (a) Time course following loading exogenous NBD-PE/POPC liposomes. Cells were exposed to liposomes, washed with PBS, and maintained in complete media for 0 or 2 h. MitoTracker (red) and NBD-PE (green) confirmed the accumulation of NBD-PE in mitochondria at 2 h after liposome loading. Blue, DAPI. Scale Bar, 5  $\mu$ m. (b) A schematic diagram of human TRIM31 and the corresponding mutants. The RING, B-box, and coiled-coil domains are depicted in green, pink, and blue, respectively. Myc-tagged TRIM31 lacking the N-terminus region contained RING domain (TRIM31 $\Delta$ N), B-box (TRIM31 $\Delta$ BB), or the C-terminus region (TRIM31 $\Delta$ C) (c) *left*, Myc-tagged wild-type TRIM31 (WT) and the corresponding deletion mutants ( $\Delta$ N,  $\Delta$ BB,  $\Delta$ C-term) were individually transfected into HeLa cells, and then labeled with NBD-PE using NBD-PE/POPC liposomes. Cells were fixed and immunostained with anti-Myc antibody. Scale bars, 5  $\mu$ m. Quantification for TRIM31-PE interaction is shown in the right graph. \* $P$ <0.01 (Student's  $t$ -test). *Right bottom panels*, expression of Myc-tagged wild-type TRIM31 and the corresponding deletion mutants were determined by immunoblot analysis. All data are representative of at least three independent experiments (mean  $\pm$  s.d. in c).

Supplementary Figure 6. Ra et al.

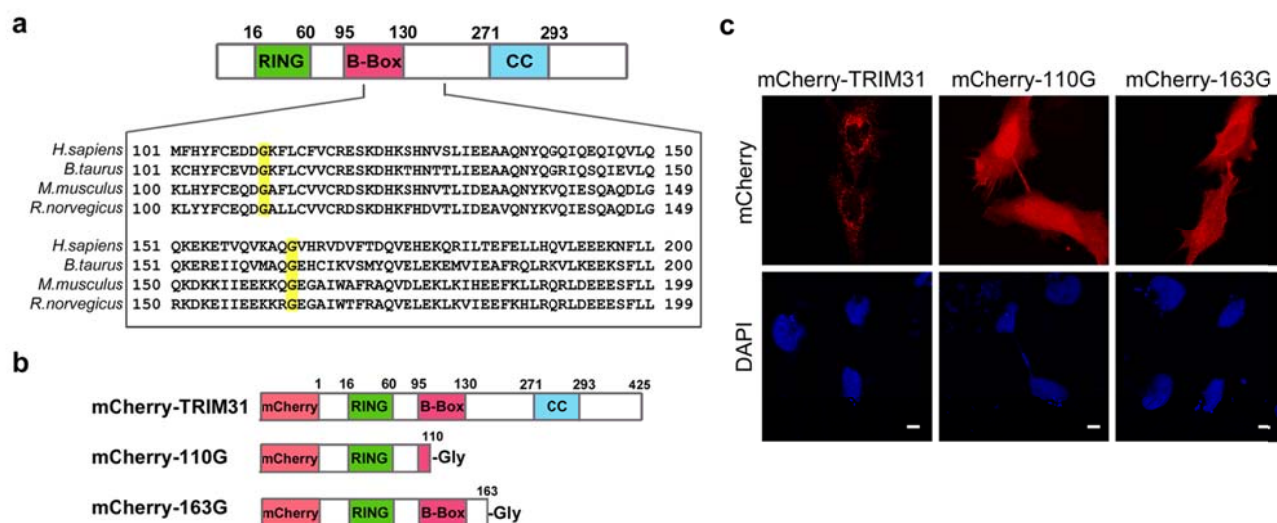

**Supplementary Figure 6. Exposed glycine 110 and 163 of TRIM31 is not conjugated to phosphatidylethanolamine.** (a) A schematic diagram of TRIM31 and multiple amino acid sequence alignment from residue 101 to 200. Yellow boxes indicate conserved glycine residues, Gly110 and Gly163. (b) Schematic representation of mCherry-tagged wild-type and C-terminal glycine-exposed TRIM31. Conserved glycine 110 and 163 are exposed at the C-terminus. (c) HeLa cells transiently expressing mCherry-TRIM31, mCherry-110G, and mCherry-163G were fixed and analyzed by immunofluorescence assay. Blue, DAPI. Scale Bar, 5  $\mu$ m. All data are representative of at least three independent experiments.

Supplementary Figure 7. Ra et al.

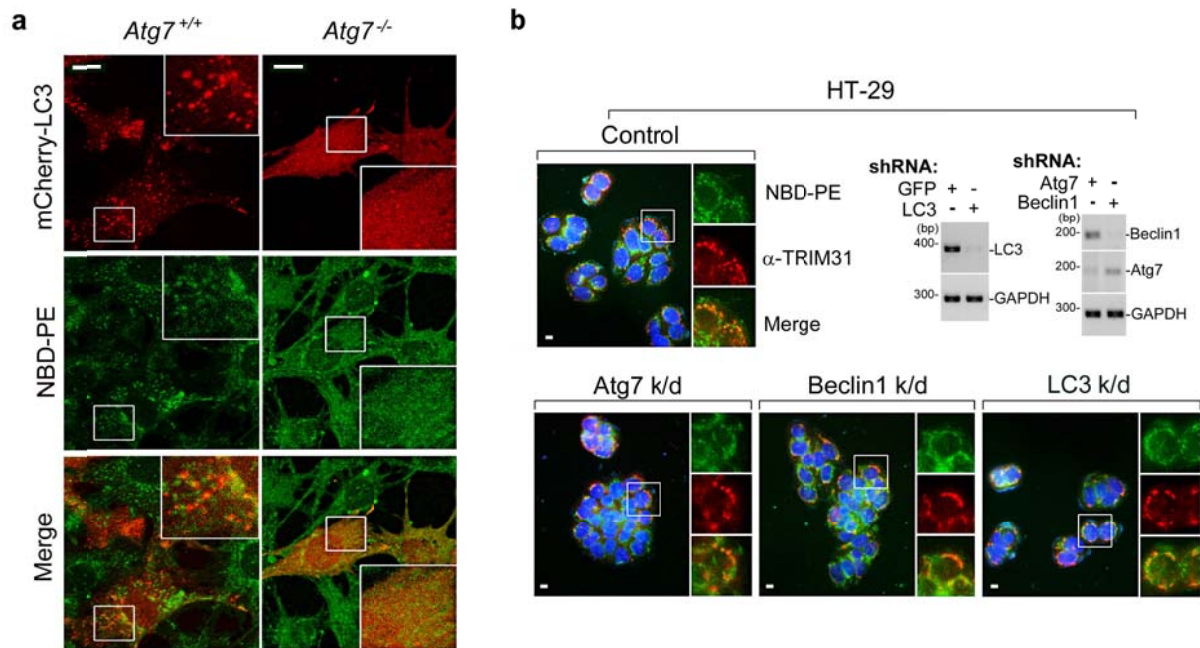

**Supplementary Figure 7. TRIM31-PE interaction occurs via an alternative autophagy process. (a)** Wild-type or *Atg7*<sup>-/-</sup> MEF cells transiently expressing mCherry-LC3 (red) were labeled with NBD-PE (green) for 1 h. Colocalization of mCherry-LC3 with NBD-PE was determined using confocal microscopy. Scale bar, 5 μm. **(b)** HT-29 cells stably expressing shRNA for *Atg7*, *Beclin1*, or *LC3* were labeled with NBD-PE (green) using 20% NBD-PE/80% POPC liposomes for 1 h, fixed in 3.7% formaldehyde, and immunostained with anti-TRIM31 antibody. Blue, DAPI. Scale bars, 5 μm. Depletion of *Atg7*, *Beclin1*, or *LC3* was confirmed by RT-PCR using the indicated primer pairs. All data are representative of at least three independent experiments.

**Supplementary Figure 8. Ra et al.**

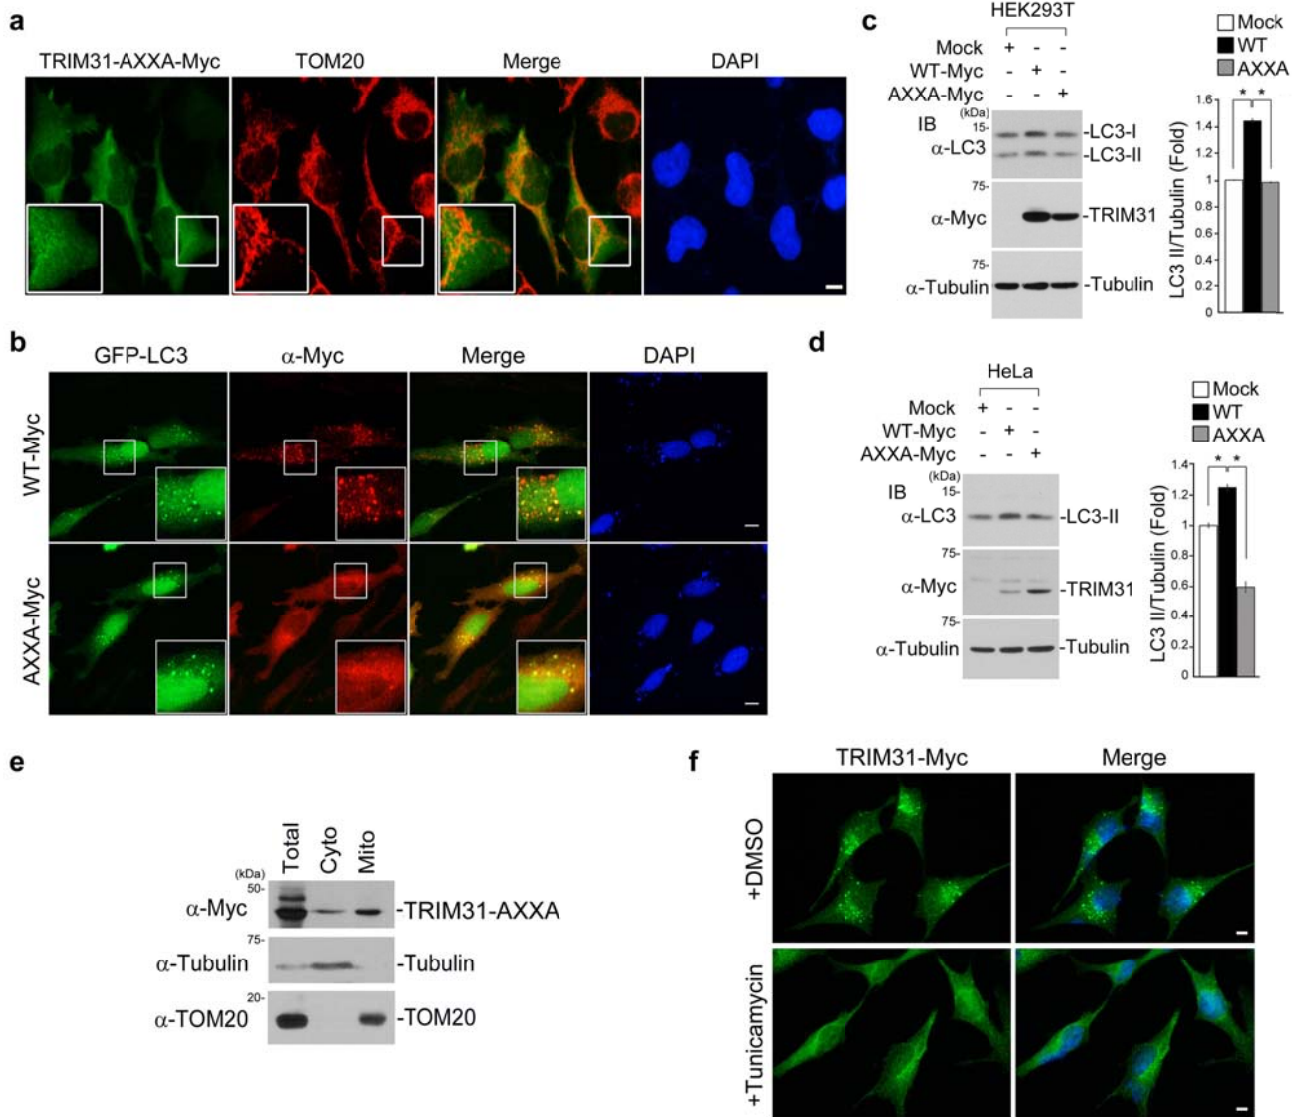

**Supplementary Figure 8. Palmitoylation is essential for TRIM31-mediated autophagic activity.** (a) Mitochondrial localization of TRIM31-AXXA-Myc in HeLa cells stably expressing TRIM31-AXXA-Myc. Cells were immunostained with anti-Myc (green) and anti-TOM20 (red) antibodies, followed by counterstaining with DAPI (blue). TOM20 was used as a mitochondrial marker. Scale bars, 5  $\mu$ m. All data are representative of at least two independent experiments. (b) Immunofluorescence assay of HeLa cells cotransfected with GFP-LC3 and each TRIM31-Myc construct. Blue, DAPI. Scale bars, 5  $\mu$ m. (c and d) Immunoblot analysis of LC3-II in protein extracts from HEK293T (c) or HeLa cells (d) transfected with pLHCX (Mock), WT-TRIM31 (WT-Myc), or AXXA-mutated TRIM31-Myc (AXXA-Myc) vectors. *Right graph*, quantification of LC3-II levels normalized against tubulin. \* $P < 0.01$  (Student's *t*-test). (e) Mitochondrial localization of AXXA-mutated TRIM31-Myc (AXXA-Myc). Anti-Tubulin and anti-TOM20 antibodies were used to detect the cytosolic (Cyto) and mitochondrial (Mito) fractions, respectively. (f) HeLa cells stably expressing TRIM31-Myc were treated for 1 h with DMSO or tunicamycin (20  $\mu$ g per ml), a compound which inhibits palmitoylation. Cells were immunostained using anti-Myc antibody and analyzed by immunofluorescence assay. Scale bars, 5  $\mu$ m. All data are representative of at least three independent experiments (mean  $\pm$  s.d. in c and d).



Supplementary Figure 9. Ra et al.

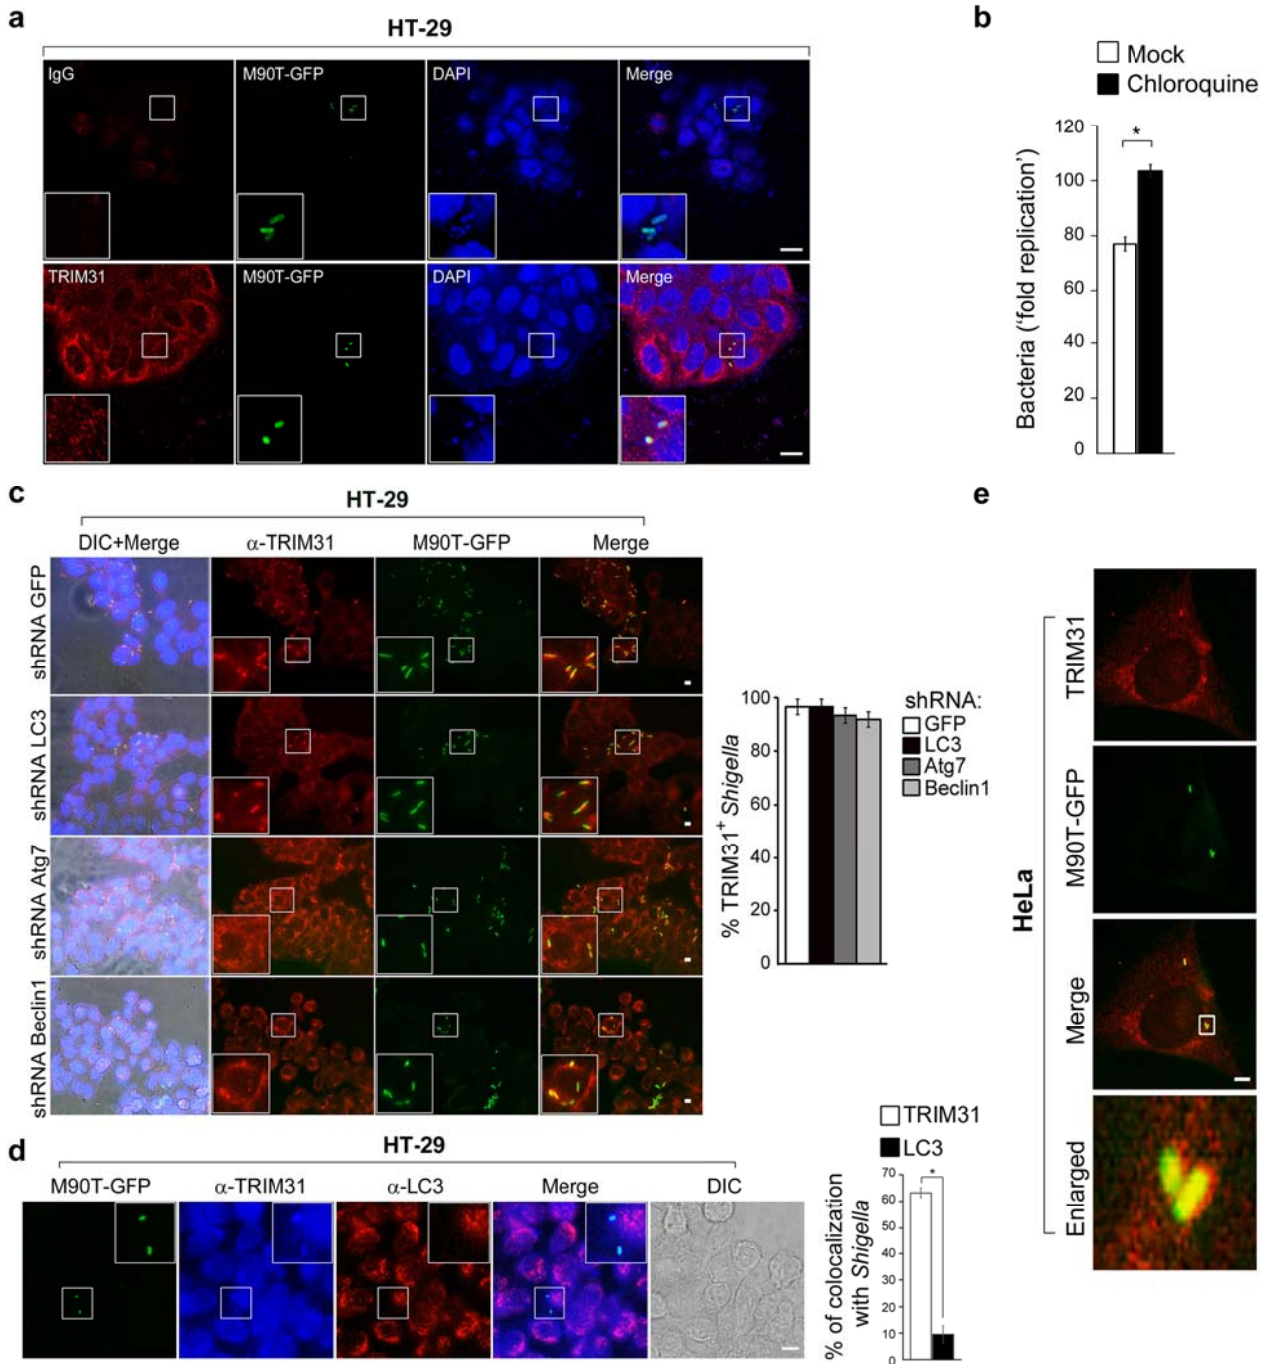

**Supplementary Figure 9. Colocalization of endogenous TRIM31 with *Shigella* in HT-29 cells** (a) HT-29 cells were infected with GFP-tagged *S. flexneri* M90T (green), washed twice with PBS, and chased in complete media for 1 h with gentamicin (100  $\mu$ g per ml) to eliminate extracellular bacteria. Cells were fixed and immunostained with anti-TRIM31 antibody (red), followed by counterstaining with DAPI (blue). Scale bar, 5  $\mu$ m. (b) The bacterial recovery assay in HT-29 cells that were left untreated or treated with chloroquine (5  $\mu$ M) for 4 h. Cells were infected with M90T-GFP and incubated for 2 h with gentamicin (100  $\mu$ g per ml). \* $P$ <0.01 (Student's  $t$ -test). (c) Immunofluorescence assay of *Shigella*-infected HT-29 cells stably expressing shRNA GFP, shRNA LC3, shRNA Atg7, or shRNA Beclin1. After infection with M90T-GFP (green), cells were incubated with gentamicin (100 $\mu$ g per ml)

for 1 h and immunostained for endogenous TRIM31 (red). DIC, differential interference contrast; Blue, DAPI. Scale bars, 5  $\mu\text{m}$ . *Right Graph*, quantification of TRIM31-positive puncta in HT-29 cells stably expressing shRNA GFP, shRNA LC3, shRNA Atg7, or shRNA Beclin1. **(d)** HT-29 cells infected with M90T-GFP (green) were stained with anti-TRIM31 (blue) and anti-LC3 (red) antibodies. DIC, differential interference contrast. Scale bar, 5  $\mu\text{m}$ . *Right graph*, quantification of TRIM31- or LC3-positive bacteria in HT-29 cells. \* $P < 0.01$  (Student's *t*-test). **(e)** TRIM31-overexpressing HeLa cells infected for 1 h with M90T-GFP (green) were stained with anti-TRIM31 antibody (red) and then visualized by IFA. Scale bar, 5  $\mu\text{m}$ . All data are representative of at least two independent experiments (mean  $\pm$  s.d. in **b**, and **d**).

Supplementary Figure 10. Ra et al.

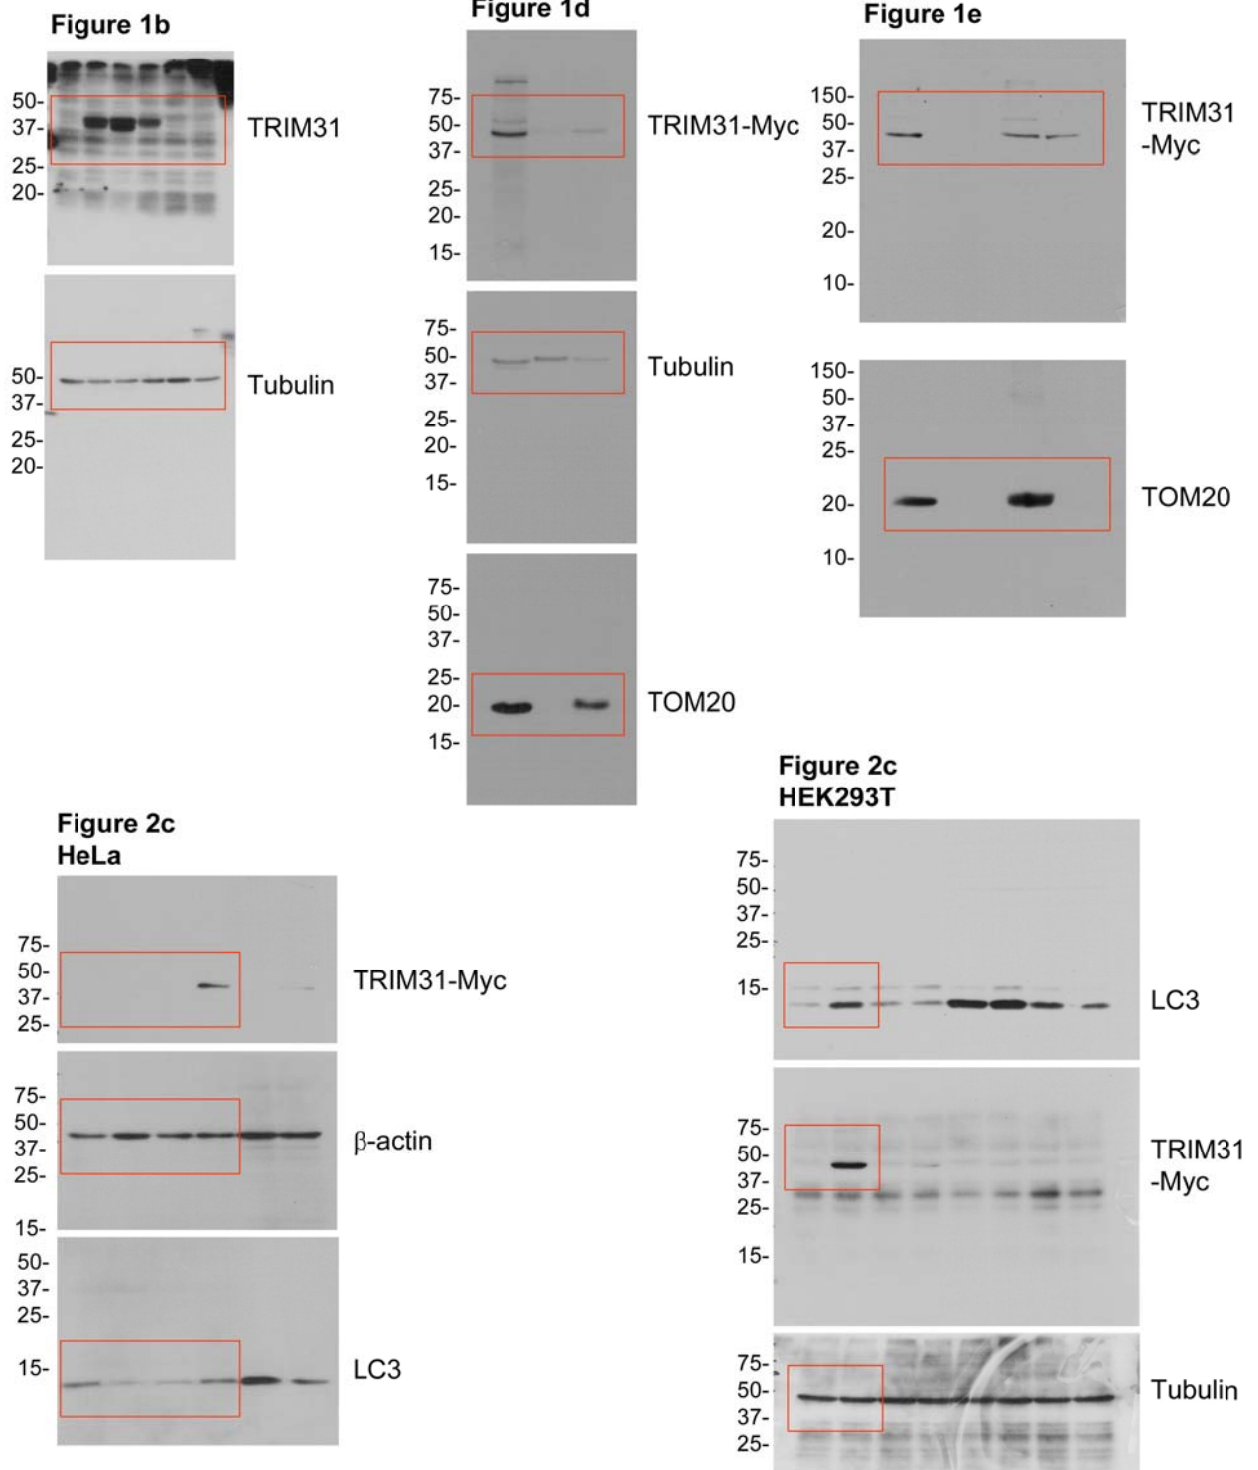

**Figure 2e**

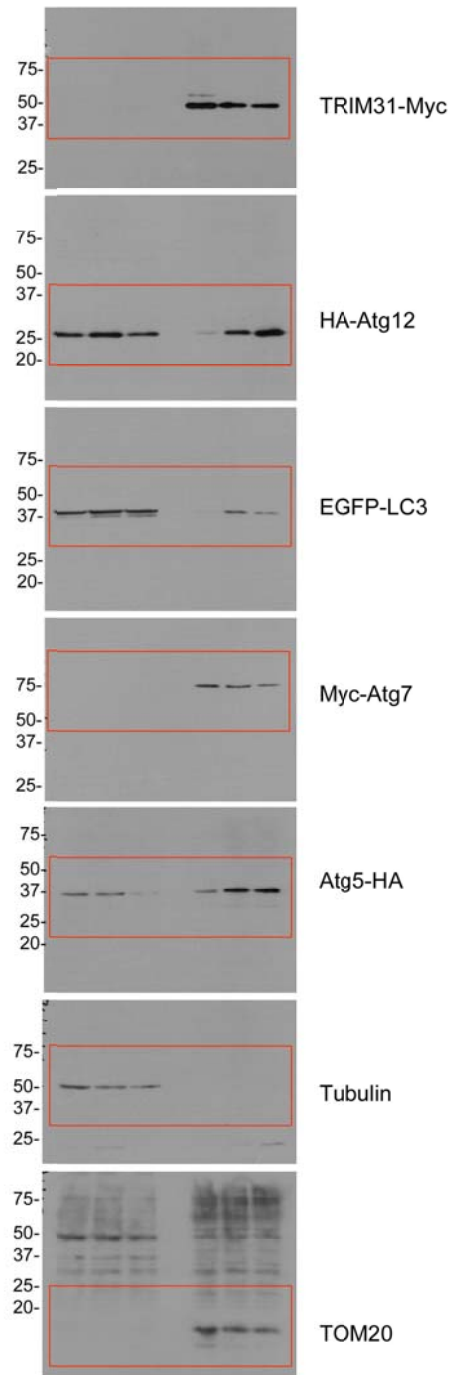

**Figure 3f**

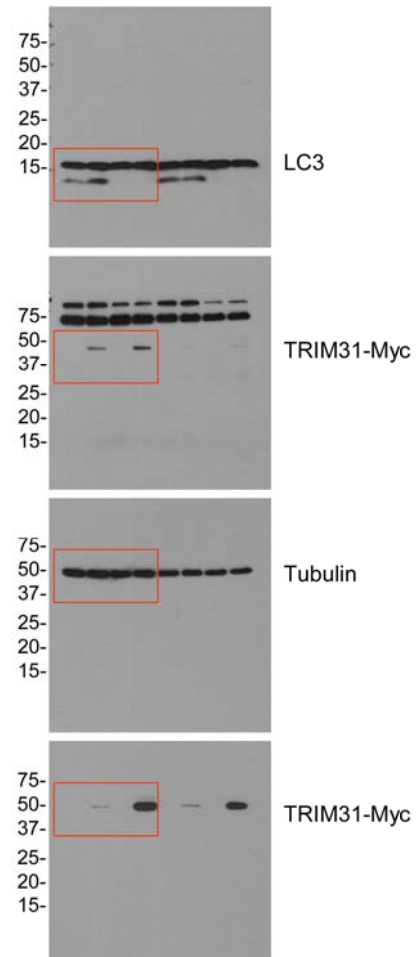

**Figure 6b**

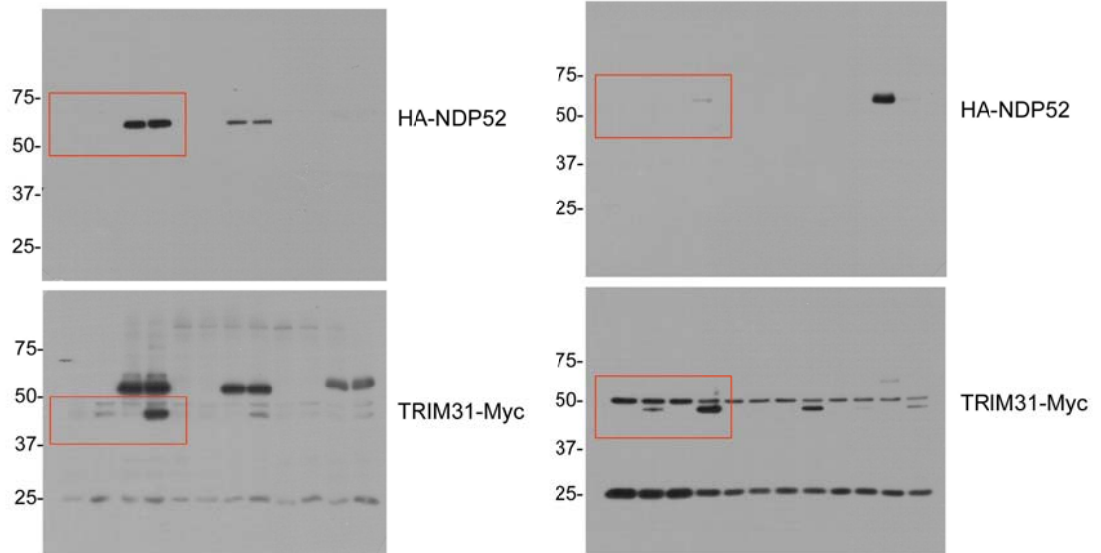

**Supplementary Figure 10. List of uncropped images of western blot analysis**

**Supplementary Table 1. Sequences of oligomers for shRNA, mutagenesis, and RT-PCR**

| <b>shRNA</b>              |                                                                           |
|---------------------------|---------------------------------------------------------------------------|
| shRNA TRIM31 sense        | 5'-GATCCGAGCAGATCCAAGTCTTGCTTCAAGAGAGCAA<br>GACTTGGATCTGCTCTTTTTTGGAAA-3' |
| shRNA TRIM31 antisense    | 5'-AGCTTTTCCAAAAAAGAGCAGATCCAAGTCTTGCTCTC<br>TTGAAGCAAGACTTGGATCTGCTCG-3' |
| shRNA GFP sense           | 5'-GATCCGCAAGCTGACCCTGAAGTTCCTC<br>GAGGAACTTCAGGGTCAGCTTGCTTTTTTGGAAA-3'  |
| shRNA GFP antisense       | 5'-AGCTTTTCCAAAAAAGCAAGCTGACCCTGAAGTTCCTC<br>GAGGAACTTCAGGGTCAGCTTGCGG-3' |
| shRNA LC3B sense          | 5'-GATCCGCTGAGATCGATCAGTTCATCTCGAGATGAAC<br>TGATCGATCTCAGTTTTTTTGGAAA-3'  |
| shRNA LC3B antisense      | 5'-AGCTTTTCCAAAAAAGTGAAGATCGATCAGTTCATCTC<br>GAGATGAACTGATCGATCTCAGCG-3'  |
| shRNA Atg7 sense          | 5'-GATCCGGAGTCACAGCTTTCCTTCTCGAGAAGGAAG<br>AGCTGTGACTCCTTTTTTGGAAA-3'     |
| shRNA Atg7 antisense      | 5'-AGCTTTTCCAAAAAAGGAGTCACAGCTTTCCTTCTC<br>GAGAAGGAAGAGCTGTGACTCCG-3'     |
| shRNA Beclin1 sense       | 5'-GATCCGCAGTTTGGCACAATCAATACTCGAGTATTGA<br>TTGTGCCAAACTGTTTTTTTGGAAA-3'  |
| shRNA Beclin1 antisense   | 5'-AGCTTTTCCAAAAAACAGTTTGGCACAATCAATACTCG<br>AGTATTGATTGTGCCAAACTGCG-3'   |
| <b>TRIM31 mutagenesis</b> |                                                                           |
| TRIM31 sense              | 5'-GCTAAGCTTGCCACCATGGCCAGTGGGCAGTTTGTGAA-3'                              |
| TRIM31 antisense          | 5'-GCTAGATCTGCTTGAAGGAACCTTACAAAACCAAG-3'                                 |
| ΔN sense                  | 5'-ATTAAGCTTGCCACCATGAGGAAGAACGCAATC<br>AGGTTCAACT-3'                     |
| ΔC antisense              | 5'-ATTAGATCTGAATTTTTTCAGGCTCCCTGTGATG-3'                                  |
| ΔRING sense               | 5'-GCAAGAGGAAGTGATCAGGAAGAACGCAATCAG-3'                                   |
| ΔRING antisense           | 5'-CTGATTGCGTTCTTCTGATCACTTCTTCTTGC-3'                                    |
| ΔBB sense                 | 5'-CAGTCCAAAAGGAAAGAGGCTACAGAAGAAGCTGCCC<br>AGAATTATCAG-3'                |
| ΔBB antisense             | 5'-CTGATAATTCTGGGCAGCTTCTTCTGTAGCCTCTTCC<br>TTTTGGACTG-3'                 |
| AXXA sense                | 5'-ATGGGAAGTTCCTCGCTTTTGTGGCTCGTGA<br>ATCCAAGGA-3'                        |
| AXXA antisense            | 5'-TCCTTGGATTACGAGCCACAAAAGCGAGG<br>AACTTCCCAT-3'                         |
| <b>RT-PCR</b>             |                                                                           |
| TRIM31 sense              | 5'-CGTAAGGAAGAACGCAATCAGGTT-3'                                            |
| TRIM31 antisense          | 5'-CTTCTCATGTTCTACCTGGTCCG-3'                                             |

|                   |                                    |
|-------------------|------------------------------------|
| LC3B sense        | 5'-ATGCCGTCGGAGAAGACCTTCA-3'       |
| LC3B antisense    | 5'-TTACACTGACAATTTTCATCCCGAACGT-3' |
| Beclin1 sense     | 5'-TGTCACCATCCAGGAACTC-3'          |
| Beclin1 antisense | 5'-CTGTTGGCACTTTCTGTGG-3'          |
| Atg7 sense        | 5'-GGAGATTCAACCAGAGACC-3'          |
| Atg7 antisense    | 5'-GCACAAGCCCAAGAGAGG-3'           |
| IE1 sense         | 5'-CTGATAATCCTGACGAGGGC-3'         |
| IE1 antisense     | 5'-TGCTCCTTGATTCTATGCCG-3'         |
| GAPDH sense       | 5'-TGATGACATCAAGAAGGTGGTGAA-3'     |
| GAPDH antisense   | 5'-TCCTTGGAGGCCATGTGGGCCAT-3'      |

### Supplementary Table 2. Detailed CD patient information

#### IHC (n=8)

| Patient # | Sex | Age | Duration(yr) | Location    | Behavior    | Treatment | Severity* |
|-----------|-----|-----|--------------|-------------|-------------|-----------|-----------|
| 1         | M   | 43  | 9            | Ileocolonic | Penetrating | ADA, AZA  | Moderate  |
| 2         | M   | 43  | 6            | Ileocolonic | Penetrating | -         | Moderate  |
| 3         | M   | 23  | 7            | Ileocolonic | Penetrating | AZA       | Moderate  |
| 4         | F   | 33  | 15           | Ileocolonic | Penetrating | -         | Moderate  |
| 5         | M   | 32  | 8            | Ileocolonic | Stricturing | IFX       | Moderate  |
| 6         | F   | 35  | 10           | Ileocolonic | Penetrating | AZA       | Moderate  |
| 7         | F   | 41  | 16           | Ileal       | Penetrating | -         | Moderate  |
| 8         | M   | 49  | 11           | Ileocolonic | Penetrating | ADA       | Moderate  |

\*Remission: CDAI score <150. Mild: CDAI score of 150-219. Moderate: CDAI score of 220-450.

Severe: CDAI score >450

CDAI, Crohn's Disease Activity Index; ADA, adalimumab; AZA, azathioprine; IFX, infliximab

#### RT-PCR (n=3)

| Patient # | Sex | Age | Location    | Behavior     | Treatment | Activity*    |
|-----------|-----|-----|-------------|--------------|-----------|--------------|
| 1         | M   | 17  | Ileocolonic | Inflammatory | Remicade  | Active phase |
| 2         | M   | 21  | Ileocolonic | Inflammatory | -         | Active phase |
| 3         | M   | 28  | Ileocolonic | Inflammatory | -         | Active phase |

\*Remission phase: CDAI score <150. Active phase: CDAI score ≥150

CDAI, Crohn's Disease Activity Index; AZA, azathioprine
